# Supplementary material for: Growth Stage-, Organ- and Time-Dependent Salt Tolerance of Halophyte Tripolium pannonicum (Jacq.) Dobrocz
Source: MDPI journal article supplement (doi:10.3390/life13020462), 2023-02-07
Supplement: s1 [file s1]

**Table S1.** Analysis of variances (mean squares) for the germination and the growth parameters of *T. pannonicum* in four salt concentrations.

| Trait                  | Sources of Variations |           |
|------------------------|-----------------------|-----------|
|                        | S                     | Error     |
| df                     | 3                     | 8         |
| Germination parameters | GP                    | 2929 **   |
|                        | GI                    | 36.5 **   |
|                        | MGT                   | 17.4 **   |
|                        | GE                    | 346 **    |
| Growth parameters      | SL                    | 141 **    |
|                        | RL                    | 7.00 **   |
|                        | FM <sub>T</sub>       | 11.5 **   |
|                        | FM <sub>S</sub>       | 15.8 **   |
|                        | FM <sub>R</sub>       | 0.910 n.s |

GP= Germination percentage; GI= Germination index; MGT= Mean germination time; GE= Germination energy; SL= Shoot length; RL= Root length; FM<sub>T</sub> = Total Fresh mass; FM<sub>S</sub> = Shoot fresh mass; FM<sub>R</sub> = Root fresh mass; S = salinity; df = degrees of freedom; ns = non-significant; Error = within group variance. \*\* =  $p \leq 0.01$ .

**Table S2.** Analysis of variances (mean squares) for the activity of antioxidant enzymes (APX and POD) and salinity stress indicators (H<sub>2</sub>O<sub>2</sub> and proline) of *T. pannonicum* in four salt concentrations.

| Trait                          | Sources of Variations |       |
|--------------------------------|-----------------------|-------|
|                                | S                     | Error |
| df                             | 3                     | 8     |
| APX <sub>R</sub>               | 2424 **               | 0.707 |
| APX <sub>S</sub>               | 9830 **               | 0.758 |
| APX <sub>L</sub>               | 2086 **               | 1.78  |
| POD <sub>R</sub>               | 18.9 **               | 0.228 |
| POD <sub>S</sub>               | 2.78 **               | 0.031 |
| POD <sub>L</sub>               | 0.89 **               | 0.027 |
| H <sub>2</sub> O <sub>2R</sub> | 2.76 *                | 0.569 |
| H <sub>2</sub> O <sub>2S</sub> | 106 **                | 0.434 |
| H <sub>2</sub> O <sub>2L</sub> | 41.1 **               | 0.224 |
| P <sub>R</sub>                 | 2396 **               | 0.678 |
| P <sub>S</sub>                 | 7554 **               | 86.2  |
| P <sub>L</sub>                 | 4069 **               | 7.9   |

APX<sub>R</sub> = Root ascorbate peroxidase enzyme activity; APX<sub>S</sub> = Steam ascorbate peroxidase enzyme activity; APX<sub>L</sub> = Leaf ascorbate peroxidase enzyme activity; POD<sub>R</sub> = Root peroxidase enzyme activity; POD<sub>S</sub> = Shoot peroxidase enzyme activity; POD<sub>L</sub> = Leaf peroxidase enzyme activity; H<sub>2</sub>O<sub>2R</sub> = Root H<sub>2</sub>O<sub>2</sub> concentration; H<sub>2</sub>O<sub>2S</sub> = Steam H<sub>2</sub>O<sub>2</sub> concentration; H<sub>2</sub>O<sub>2L</sub> = Leaf H<sub>2</sub>O<sub>2</sub> concentration; P<sub>R</sub> = Root proline concentration; P<sub>S</sub> = Steam proline concentration; P<sub>L</sub> = Leaf proline concentration; S = salinity; df = degrees of freedom; ns = non-significant; Error = within group variance. \* =  $p \leq 0.05$ , \*\* =  $p \leq 0.01$ .

**Table S3.** Analysis of variances (mean squares) for the activity of antioxidant enzymes (APX and POD) and salinity stress indicators (H<sub>2</sub>O<sub>2</sub> and proline) of *T. pannonicum* in eight different times of measurements.

| Trait                         | Sources of Variations |       |
|-------------------------------|-----------------------|-------|
|                               | Time                  | Error |
| df                            | 7                     | 56    |
| APX                           | 3.21 **               | 0.182 |
| POD                           | 2.31 **               | 0.238 |
| H <sub>2</sub> O <sub>2</sub> | 369 **                | 3.59  |
| P                             | 29448 **              | 833   |

APX= Ascorbate peroxidase enzyme activity; POD= Peroxidase activity; H<sub>2</sub>O<sub>2</sub>= H<sub>2</sub>O<sub>2</sub> concentration; P= proline concentration; Time = eight different times of measurements; df = degrees of freedom; Error = within group variance, \*\* = p ≤ 0.01.

**Table S4.** Correlation coefficients matrix between germination and growth parameters under NaCl stress.

| Pearson's r     | GP     | GI      | MGT    | GE      | SL      | RL       | FM <sub>T</sub> | FM <sub>S</sub> | FM <sub>R</sub> |
|-----------------|--------|---------|--------|---------|---------|----------|-----------------|-----------------|-----------------|
| GP              | -      | * 0,998 | -0,870 | * 1,000 | * 0,968 | 0,885    | * 0,995         | * 0,971         | -0,856          |
| GI              | 0,998  | -       | -0,889 | * 0,998 | * 0,969 | 0,897    | * 0,991         | * 0,979         | -0,883          |
| MGT             | -0,870 | -0,889  | -      | -0,874  | -0,935  | * -0,989 | -0,880          | * -0,962        | * 0,973         |
| GE              | 1,000  | 0,998   | -0,874 | -       | * 0,973 | 0,891    | * 0,997         | * 0,973         | -0,855          |
| SL              | 0,968  | 0,969   | -0,935 | 0,973   | -       | * 0,963  | * 0,985         | * 0,987         | -0,879          |
| RL              | 0,885  | 0,897   | -0,989 | 0,891   | 0,963   | -        | 0,907           | * 0,967         | -0,932          |
| FM <sub>T</sub> | 0,995  | 0,991   | -0,880 | 0,997   | 0,985   | 0,907    | -               | * 0,975         | -0,844          |
| FM <sub>S</sub> | 0,971  | 0,979   | -0,962 | 0,973   | 0,987   | 0,967    | 0,975           | -               | -0,939          |
| FM <sub>R</sub> | -0,856 | -0,883  | 0,973  | -0,855  | -0,879  | -0,932   | -0,844          | -0,939          | -               |

Color in the matrix highlights the sign and magnitude of coefficients. Red indicates a negative correlation, blue indicates positive values. The intensity of the color represents the magnitude of the value when the darker is more extreme. Abbreviations as in Supplementary Table S1. Statistical significance was assessed at the p < 0.05 and marked by a star.

**Table S5.** Correlation coefficients matrix between antioxidant enzymes and salinity stress indicators under NaCl stress.

| Pearson's r                          | APX root | APX stem | APX leaves | POD root | POD stem | POD leaves | H <sub>2</sub> O <sub>2</sub> root | H <sub>2</sub> O <sub>2</sub> stem | H <sub>2</sub> O <sub>2</sub> leaves | proline root | proline stem | proline leaves |
|--------------------------------------|----------|----------|------------|----------|----------|------------|------------------------------------|------------------------------------|--------------------------------------|--------------|--------------|----------------|
| APX root                             | -        | 0,624    | 0,941      | 0,739    | 0,891    | 0,671      | 0,636                              | 0,838                              | * 0,961                              | * 0,978      | * 0,990      | * 0,985        |
| APX stem                             | 0,624    | -        | 0,817      | * 0,644  | * 0,751  | 0,253      | 0,225                              | 0,323                              | 0,393                                | * 0,750      | * 0,560      | * 0,643        |
| APX leaves                           | 0,941    | 0,817    | -          | 0,661    | 0,850    | 0,452      | 0,655                              | 0,635                              | 0,814                                | * 0,955      | 0,891        | 0,909          |
| POD root                             | 0,739    | 0,644    | 0,661      | -        | 0,956    | 0,895      | -0,049                             | * 0,864                            | 0,699                                | 0,834        | * 0,790      | * 0,844        |
| POD stem                             | 0,891    | 0,751    | 0,850      | 0,956    | -        | 0,815      | 0,231                              | 0,866                              | 0,821                                | * 0,957      | 0,909        | * 0,951        |
| POD leaves                           | 0,671    | 0,253    | 0,452      | 0,895    | 0,815    | -          | -0,053                             | 0,959                              | 0,758                                | 0,696        | 0,765        | 0,774          |
| H <sub>2</sub> O <sub>2</sub> root   | 0,636    | 0,225    | 0,655      | -0,049   | 0,231    | -0,053     | -                                  | 0,232                              | 0,610                                | 0,501        | 0,557        | 0,491          |
| H <sub>2</sub> O <sub>2</sub> stem   | 0,838    | 0,323    | 0,635      | 0,864    | 0,866    | 0,959      | 0,232                              | -                                  | 0,912                                | 0,826        | 0,906        | 0,898          |
| H <sub>2</sub> O <sub>2</sub> leaves | 0,961    | 0,393    | 0,814      | 0,699    | 0,821    | 0,758      | 0,610                              | 0,912                              | -                                    | 0,901        | * 0,981      | 0,950          |
| proline root                         | 0,978    | 0,750    | 0,955      | 0,834    | 0,957    | 0,696      | 0,501                              | 0,826                              | 0,901                                | -            | * 0,968      | * 0,988        |
| proline stem                         | 0,990    | 0,560    | 0,891      | 0,790    | 0,909    | 0,765      | 0,557                              | 0,906                              | 0,981                                | 0,968        | -            | * 0,993        |
| proline leaves                       | 0,985    | 0,643    | 0,909      | 0,844    | 0,951    | 0,774      | 0,491                              | 0,898                              | 0,950                                | 0,988        | 0,993        | -              |

Color in the matrix highlights the sign and magnitude of coefficients. Red indicates a negative correlation, blue indicates positive values. The intensity of the color represents the magnitude of the value when the darker is more extreme. Statistical significance was assessed at the p < 0.05 and marked by a star. APX= Ascorbate peroxidase enzyme activity; POD= Peroxidase activity, H<sub>2</sub>O<sub>2</sub>= H<sub>2</sub>O<sub>2</sub> concentration.

**Table S6.** Correlation coefficients matrix between antioxidant enzymes and salinity stress indicators under the different times of the duration of salinity stress.

| Pearson's r                   | APX   | POD     | H <sub>2</sub> O <sub>2</sub> | proline |
|-------------------------------|-------|---------|-------------------------------|---------|
| APX                           | -     | * 0,984 | * 0,666                       | 0,455   |
| POD                           | 0,984 | -       | * 0,532                       | 0,647   |
| H <sub>2</sub> O <sub>2</sub> | 0,666 | 0,532   | -                             | * 0,385 |
| proline                       | 0,455 | 0,647   | * 0,385                       | -       |

Color in the matrix highlights the sign and magnitude of coefficients. Red indicates a negative correlation, blue indicates positive values. The intensity of the color represents the magnitude of the value when the darker is more extreme. Statistical significance was assessed at the  $p < 0.05$  and marked by a star. APX= Ascorbate peroxidase enzyme activity; POD= Peroxidase activity, H<sub>2</sub>O<sub>2</sub>= H<sub>2</sub>O<sub>2</sub> concentration.
